# Supplementary material for: Retracing Storage Polysaccharide Evolution in Stramenopila
Source: Front Plant Sci. 2021 Mar 3;12:629045. doi: 10.3389/fpls.2021.629045 (PMC7965971; doi:10.3389/fpls.2021.629045)
Supplement: Supplementary Table 2 — Table of targeting prediction and transmembrane domains for GT48, GH16_2, GH81, GH5_33, and GH161. [file Table_2.xls]

## Sheet: Sheet1
For each entry (1st column) found in our annotation table for GH5_33, GH16_2, GH81, GH161 and GT48 we look for secretion signal and transmembrane domains. Annotation was performed using PredSL (2nd colum) and For each entry (1st column) found in our annotation table for GH5_33, GH16_2, GH81, GH161 and GT48 we look for secretion signal and transmembrane domains. Annotation was performed using Pred…
GH5_33
sequence id	PredSL	TargetP2.0	Predictive conclusion	Number of transmembrane domains
65357|CCI10986.1	mitochondrion	secreted		PredHel=1
65357|CCI47610.1	secreted	secreted	VACUOLE	PredHel=1
65357|CCI48042.1	other	secreted		PredHel=0
44056|AA0003G01770	secreted	secreted	VACUOLE	PredHel=1
2880|ES0054G00070	secreted	secreted	VACUOLE	PredHel=1
186039|FC006G09830	other	OTHER		PredHel=1
186039|FC025G01360	other	OTHER		PredHel=1
jgi|Ochro2298_1|403655|gm1.14770_g	secreted	secreted	VACUOLE	PredHel=0
jgi|Ochro2298_1|452894|fgenesh1_kg.2979_#_1_#_Locus2739v1rpkm73.15	secreted	secreted	VACUOLE	PredHel=0
2850|PTI_21G01890	other	OTHER		PredHel=0
4787|XP_002902737.1	secreted	OTHER		PredHel=0
4787|XP_002902738.1	secreted	secreted	VACUOLE	PredHel=0
4787|XP_002903391.1	secreted	secreted	VACUOLE	PredHel=1
4787|XP_002903392.1	secreted	secreted	VACUOLE	PredHel=1
4787|XP_002905367.1	other	OTHER		PredHel=1
37319|251407	other	OTHER		PredHel=1
65071|PYU1_T011841	secreted	secreted	VACUOLE	PredHel=1
65071|PYU1_T011822	secreted	secreted	VACUOLE	PredHel=1
695850|XP_012209088.1	secreted	secreted	VACUOLE	PredHel=1
35128|TP02G04950	other	OTHER		PredHel=0
GH16_2
sequence id	PredSL	TargetP2.0	Predictive conclusion	Number of transmembrane domains
65357|CCI39225.1	secreted	secreted	VACUOLE	PredHel=1
65357|CCI40478.1	secreted	secreted	VACUOLE	PredHel=1
65357|CCI44158.1	secreted	secreted	VACUOLE	PredHel=1
65357|CCI44651.1	secreted	secreted	VACUOLE	PredHel=1
65357|CCI47008.1	secreted	secreted	VACUOLE	PredHel=0
65357|CCI47647.1	other	OTHER		PredHel=1
44056|AA0003G02320	secreted	secreted	VACUOLE	PredHel=1
44056|AA0005G00260	other	OTHER		PredHel=2
2880|ES0243G00180	secreted	OTHER		PredHel=0
2880|ES0100G00480	mitochondrion	OTHER		PredHel=1
186039|FC006G07240	secreted	secreted	VACUOLE	PredHel=0
186039|FC001G11230	other	OTHER		PredHel=0
186039|FC009G00750	other	OTHER		PredHel=0
jgi|Ochro2298_1|431888|fgenesh1_pg.2135_#_1	secreted	OTHER		PredHel=1
jgi|Ochro2298_1|456859|fgenesh1_kg.5556_#_1_#_Locus8721v1rpkm24.48	secreted	secreted	VACUOLE	PredHel=1
2850|PTI_27G01050	other	OTHER		PredHel=1
2850|PTI_17G00150	secreted	secreted	VACUOLE	PredHel=2
2850|PTI_28G00290	secreted	secreted	VACUOLE	PredHel=1
4787|XP_002895302.1	other	OTHER		PredHel=0
4787|XP_002895303.1	secreted	secreted	VACUOLE	PredHel=1
4787|XP_002895304.1	secreted	secreted	VACUOLE	PredHel=2
4787|XP_002895499.1	other	OTHER		PredHel=1
4787|XP_002895500.1	other	OTHER		PredHel=1
4787|XP_002895501.1	secreted	secreted	VACUOLE	PredHel=1
4787|XP_002896371.1	other	OTHER		PredHel=0
4787|XP_002899188.1	other	OTHER		PredHel=0
4787|XP_002901110.1	other	OTHER		PredHel=1
4787|XP_002901509.1	other	OTHER		PredHel=0
4787|XP_002901510.1	other	OTHER		PredHel=1
4787|XP_002901577.1	other	OTHER		PredHel=0
4787|XP_002901581.1	secreted	OTHER		PredHel=1
4787|XP_002901582.1	secreted	secreted	VACUOLE	PredHel=0
4787|XP_002901585.1	secreted	secreted	VACUOLE	PredHel=0
4787|XP_002901586.1	other	OTHER		PredHel=0
4787|XP_002901587.1	other	OTHER		PredHel=0
4787|XP_002901588.1	secreted	secreted	VACUOLE	PredHel=1
4787|XP_002901589.1	secreted	secreted	VACUOLE	PredHel=1
4787|XP_002901590.1	other	secreted		PredHel=1
4787|XP_002901591.1	other	OTHER		PredHel=1
4787|XP_002901596.1	secreted	secreted	VACUOLE	PredHel=1
4787|XP_002903719.1	other	OTHER		PredHel=0
4787|XP_002909613.1	secreted	secreted	VACUOLE	PredHel=0
4787|XP_002997803.1	secreted	secreted	VACUOLE	PredHel=1
37319|250373	other	OTHER		PredHel=1
37319|208405	secreted	secreted	VACUOLE	PredHel=1
37319|247059	secreted	secreted	VACUOLE	PredHel=1
65071|PYU1_T005088	other	OTHER		PredHel=1
65071|PYU1_T010734	secreted	secreted	VACUOLE	PredHel=1
65071|PYU1_T010729	secreted	secreted	VACUOLE	PredHel=2
65071|PYU1_T010728	secreted	secreted	VACUOLE	PredHel=1
65071|PYU1_T010727	secreted	secreted	VACUOLE	PredHel=1
65071|PYU1_T010726	other	OTHER		PredHel=1
65071|PYU1_T010725	other	OTHER		PredHel=1
65071|PYU1_T010723	other	OTHER		PredHel=1
65071|PYU1_T010715	other	OTHER		PredHel=0
65071|PYU1_T010712	secreted	secreted	VACUOLE	PredHel=1
65071|PYU1_T010707	secreted	secreted	VACUOLE	PredHel=0
65071|PYU1_T010705	secreted	secreted	VACUOLE	PredHel=1
65071|PYU1_T010704	other	OTHER		PredHel=1
65071|PYU1_T010674	mitochondrion	secreted		PredHel=1
65071|PYU1_T001777	secreted	secreted	VACUOLE	PredHel=0
695850|XP_012198480.1	secreted	secreted	VACUOLE	PredHel=1
695850|XP_012198482.1	secreted	secreted	VACUOLE	PredHel=1
695850|XP_012198483.1	secreted	secreted	VACUOLE	PredHel=1
695850|XP_012198484.1	secreted	secreted	VACUOLE	PredHel=1
695850|XP_012198485.1	secreted	secreted	VACUOLE	PredHel=1
695850|XP_012198884.1	secreted	secreted	VACUOLE	PredHel=0
695850|XP_012200180.1	secreted	secreted	VACUOLE	PredHel=1
695850|XP_012201713.1	secreted	secreted	VACUOLE	PredHel=1
695850|XP_012205604.1	secreted	secreted	VACUOLE	PredHel=1
695850|XP_012205677.1	secreted	secreted	VACUOLE	PredHel=1
695850|XP_012207056.1	secreted	secreted	VACUOLE	PredHel=1
695850|XP_012207059.1	secreted	secreted	VACUOLE	PredHel=1
695850|XP_012210478.1	secreted	secreted	VACUOLE	PredHel=1
695850|XP_012210737.1	secreted	secreted	VACUOLE	PredHel=0
695850|XP_012211536.1	secreted	secreted	VACUOLE	PredHel=0
695850|XP_012212376.1	secreted	secreted	VACUOLE	PredHel=0
35128|TP04G09180	other	OTHER		PredHel=0
35128|TP03G00400	secreted	OTHER		PredHel=2
GH81
sequence id	PredSL	TargetP2.0	Predictive conclusion	Number of transmembrane domains
65357|CCI39538.1	secreted	secreted	VACUOLE	PredHel=0
65357|CCI40267.1	secreted	secreted	VACUOLE	PredHel=0
65357|CCI40275.1	secreted	secreted	VACUOLE	PredHel=0
65357|CCI41887.1	secreted	OTHER		PredHel=1
65357|CCI42122.1	other	OTHER		PredHel=0
65357|CCI44755.1	other	OTHER		PredHel=2
44056|AA0008G02860	secreted	secreted	VACUOLE	PredHel=1
2880|ES0099G00200	other	OTHER		PredHel=0
2880|ES0314G00040	secreted	secreted	VACUOLE	PredHel=0
2880|ES0211G00010	mitochondrion	mTP		PredHel=0
2880|ES0102G00090	secreted	secreted	VACUOLE	PredHel=0
2880|ES0248G00140	other	OTHER		PredHel=0
186039|FC024G00580	other	OTHER		PredHel=0
186039|FC248G00010	other	OTHER		PredHel=1
186039|FC021G00530	other	OTHER		PredHel=1
186039|FC026G00520	other	OTHER		PredHel=1
jgi|Ochro2298_1|392911|gm1.4026_g	other	OTHER		PredHel=0
jgi|Ochro2298_1|432880|fgenesh1_pg.2666_#_1	other	OTHER		PredHel=1
jgi|Ochro2298_1|445613|fgenesh1_kg.750_#_3_#_Locus11653v1rpkm15.59	other	OTHER		PredHel=1
jgi|Ochro2298_1|447530|fgenesh1_kg.1163_#_1_#_Locus12770v1rpkm13.04	other	OTHER		PredHel=1
2850|PTI_01G01800	other	OTHER		PredHel=1
4787|XP_002899282.1	secreted	OTHER		PredHel=1
4787|XP_002899769.1	other	OTHER		PredHel=0
4787|XP_002899770.1	secreted	secreted	VACUOLE	PredHel=0
4787|XP_002899772.1	other	OTHER		PredHel=0
4787|XP_002899774.1	other	OTHER		PredHel=0
4787|XP_002899970.1	secreted	OTHER		PredHel=1
4787|XP_002901789.1	secreted	secreted	VACUOLE	PredHel=0
4787|XP_002901835.1	secreted	secreted	VACUOLE	PredHel=0
4787|XP_002901836.1	other	OTHER		PredHel=0
4787|XP_002906576.1	secreted	secreted	VACUOLE	PredHel=0
4787|XP_002906578.1	secreted	secreted	VACUOLE	PredHel=0
4787|XP_002906579.1	secreted	secreted	VACUOLE	PredHel=0
4787|XP_002906597.1	other	OTHER		PredHel=0
4787|XP_002906598.1	other	OTHER		PredHel=0
4787|XP_002906615.1	secreted	secreted	VACUOLE	PredHel=0
4787|XP_002906796.1	other	OTHER		PredHel=0
37319|251120	other	OTHER		PredHel=0
37319|65414	other	OTHER		PredHel=0
37319|319219	other	OTHER		PredHel=0
37319|214718	other	OTHER		PredHel=0
65071|PYU1_T007115	other	OTHER		PredHel=0
65071|PYU1_T003512	other	secreted		PredHel=0
65071|PYU1_T003498	secreted	secreted	VACUOLE	PredHel=0
65071|PYU1_T006546	secreted	secreted	VACUOLE	PredHel=0
65071|PYU1_T002299	secreted	secreted	VACUOLE	PredHel=0
65071|PYU1_T002274	other	OTHER		PredHel=0
65071|PYU1_T009184	secreted	OTHER		PredHel=1
65071|PYU1_T002046	secreted	secreted	VACUOLE	PredHel=0
695850|XP_012193588.1	secreted	secreted	VACUOLE	PredHel=0
695850|XP_012194235.1	secreted	secreted	VACUOLE	PredHel=0
695850|XP_012199011.1	other	OTHER		PredHel=0
695850|XP_012200299.1	other	OTHER		PredHel=0
695850|XP_012208983.1	secreted	OTHER		PredHel=1
35128|TP01G06960	other	OTHER		PredHel=1
GH161
sequence id	PredSL	TargetP2.0	Predictive conclusion	Number of transmembrane domains
44056|AA0001G06960	other	OTHER		PredHel=0
186039|FC007G06840	secreted	secreted	VACUOLE	PredHel=0
186039|FC021G02040	other	OTHER		PredHel=0
jgi|Ochro2298_1|265644|CE265643_9006	other	OTHER		PredHel=2
jgi|Ochro2298_1|329235|e_gw1.1739.3.1	other	OTHER		PredHel=0
2850|PTI_02G01050	other	OTHER		PredHel=1
2850|PTI_12G01240	other	OTHER		PredHel=1
37319|240375	other	OTHER		PredHel=0
37319|208993	other	OTHER		PredHel=0
35128|TP04G08640	other	OTHER		PredHel=0
35128|TP19G02480	other	OTHER		PredHel=0
GT48
sequence id	PredSL	TargetP2.0	Predictive conclusion	Number of transmembrane domains
65357|CCI10635.1	other	OTHER		PredHel=26
65357|CCI39288.1	secreted	secreted	VACUOLE	PredHel=22
65357|CCI39470.1	other	OTHER		PredHel=13
65357|CCI41044.1	other	OTHER		PredHel=28
65357|CCI43915.1	other	OTHER		PredHel=15
65357|CCI45941.1	other	OTHER		PredHel=27
65357|CCI46822.1	other	OTHER		PredHel=25
65357|CCI47085.1	other	OTHER		PredHel=28
44056|AA0010G01540	other	OTHER		PredHel=11
44056|AA0005G00700	secreted	OTHER		PredHel=0
2880|ES0193G00230	other	OTHER		PredHel=13
2880|ES0338G00020	mitochondrion	OTHER		PredHel=11
2880|ES1232G00010	other	OTHER		PredHel=0
2880|ES0033G00630	other	OTHER		PredHel=17
2880|ES0211G00160	secreted	secreted	VACUOLE	PredHel=0
186039|FC006G05790	other	OTHER		PredHel=5
jgi|Ochro2298_1|170172|CE170171_2280	other	OTHER		PredHel=0
jgi|Ochro2298_1|404141|gm1.15256_g	other	OTHER		PredHel=0
2850|PTI_01G08490	other	OTHER		PredHel=5
4787|XP_002898605.1	other	OTHER		PredHel=29
4787|XP_002906408.1	secreted	secreted	VACUOLE	PredHel=20
4787|XP_002906540.1	other	OTHER		PredHel=14
4787|XP_002906541.1	other	OTHER		PredHel=15
4787|XP_002998492.1	other	OTHER		PredHel=28
4787|XP_002998554.1	other	OTHER		PredHel=26
4787|XP_002998788.1	other	OTHER		PredHel=25
37319|286438	secreted	OTHER		PredHel=22
65071|PYU1_T013084	other	OTHER		PredHel=27
65071|PYU1_T008944	other	OTHER		PredHel=26
65071|PYU1_T002378	other	OTHER		PredHel=14
65071|PYU1_T002377	other	OTHER		PredHel=14
65071|PYU1_T000747	secreted	OTHER		PredHel=14
65071|PYU1_T000567	other	OTHER		PredHel=18
65071|PYU1_T000548	other	OTHER		PredHel=9
695850|XP_012196318.1	other	OTHER		PredHel=14
695850|XP_012196319.1	other	OTHER		PredHel=13
695850|XP_012200942.1	other	OTHER		PredHel=14
695850|XP_012201201.1	other	OTHER		PredHel=28
695850|XP_012201242.1	secreted	secreted	VACUOLE	PredHel=23
695850|XP_012203581.1	other	OTHER		PredHel=29
695850|XP_012209383.1	other	OTHER		PredHel=12
695850|XP_012209842.1	other	OTHER		PredHel=24
695850|XP_012210262.1	mitochondrion	OTHER		PredHel=13
35128|TP15G03070	other	OTHER		PredHel=4
